# Inhibition of DPP-4 with Vildagliptin Improved Insulin Secretion in Response to Oral as well as "Isoglycemic" Intravenous Glucose without Numerically Changing the Incretin Effect in Patients with Type 2 Diabetes

Irfan Vardarli,\* Michael A. Nauck,\* Lars D. Köthe, Carolyn F. Deacon, Jens J. Holst, Anja Schweizer, and James E. Foley

Diabeteszentrum Bad Lauterberg (I.V., M.A.N., L.D.K.), 37431 Bad Lauterberg, Germany; Department of Biomedical Sciences (C.F.D., J.J.H.), Panum Institute, University of Copenhagen, DK-2200 Copenhagen N, Denmark; Novartis Pharma AG (A.S.), 4057 Basel, Switzerland; and Novartis Pharmaceuticals (J.E.F.), East Hanover, New Jersey 07936

**Background and Aims:** Dipeptidyl peptidase-4 (DPP-4) inhibitors block the degradation of glucagon-like peptide-1 and glucose-dependent insulintropic polypeptide. The aim of the present study was to quantitatively assess the incretin effect after treatment with the DPP-4 inhibitor vildagliptin (V) or placebo (P) in patients with type 2 diabetes.

**Materials and Methods:** Twenty-one patients (three women, 18 men) with type 2 diabetes previously treated with metformin (mean age, 59 yr; body mass index, 28.6 kg/m<sup>2</sup>; glycosylated hemoglobin, 7.3%) were studied in a two-period crossover design. They received 100 mg V once daily or P for 13 d in randomized order. The incretin effect was measured on d 12 (75-g oral glucose) and d 13 ("isoglycemic" iv glucose) based on insulin and C-peptide determinations and insulin secretion rates (ISR).

**Results:** V relative to P treatment significantly increased intact incretin concentrations after oral glucose and insulin secretory responses to both oral glucose and isoglycemic iv glucose (e.g. AUC<sub>ISR oral</sub> by 32.7%,  $P = 0.0006$ ; AUC<sub>ISR iv</sub> by 33.1%,  $P = 0.01$ ). The numerical incretin effect was not changed (IE<sub>ISR</sub>, V vs. P,  $35.7 \pm 4.9$  and  $34.6 \pm 4.0\%$ ,  $P = 0.80$ ).

**Conclusions:** DPP-4 inhibition augmented insulin secretory responses both after oral glucose and during isoglycemic iv glucose infusions, with no net change in the incretin effect. Thus, slight variations in basal incretin levels may be more important than previously thought. Or, DPP-4 inhibitor-induced change in the incretin-related environment of islets may persist overnight, augmenting insulin secretory responses to iv glucose as well. Alternatively, yet unidentified mediators of DPP-4 inhibition may have caused these effects. (*J Clin Endocrinol Metab* 96: 945–954, 2011)

Insulin secretion after oral glucose is stimulated by rising glucose concentrations and, in healthy humans, also by a substantial contribution made by so-called incretin hormones like glucose-dependent insulintropic polypeptide (GIP) and glucagon-like peptide-1 (GLP-1) (1, 2). These insulintropic gut hormones augment insulin secretion both in the fasting state and in response to elevations in

glucose concentrations, but in a glucose concentration-dependent manner (3). Incretin hormones are released after nutrient ingestion (glucose, other carbohydrates, triglycerides, proteins, *etc.*), but not during the iv administration of glucose (4–6). Therefore, oral glucose elicits a higher insulin secretory response than does iv glucose, even if the same amount of glucose is given (7) or the

ISSN Print 0021-972X ISSN Online 1945-7197  
Printed in U.S.A.

Copyright © 2011 by The Endocrine Society

doi: 10.1210/jc.2010-2178 Received September 15, 2010. Accepted December 9, 2010.

First Published Online January 14, 2011

For editorial see page 934

\* I.V. and M.A.N. contributed equally to the manuscript.

Abbreviations: DPP-4, Dipeptidyl peptidase-4; GIP, glucose-dependent insulintropic polypeptide; GLP-1, glucagon-like peptide-1.

glucose concentrations after both loads are comparable (“isoglycemia”) (8, 9). This is called the incretin effect. In patients with type 2 diabetes, the incretin effect is reduced (9), *i.e.* the contribution of gut hormones to total insulin secretory responses is substantially smaller than in healthy subjects or even completely lost. This loss is associated with a lack of insulinotropic activity of GIP in patients with type 2 diabetes and hyperglycemia (10, 11). Furthermore, reduced  $\beta$ -cell sensitivity to GLP-1 (12) may also contribute, as may a reduced secretion of GLP-1 (13). Nevertheless, this can be overcome by stimulating insulin secretion with exogenous GLP-1 (10, 14). This is the reason that GLP-1 receptor agonists are used to treat type 2 diabetes (1, 15). Another approach to elevate GLP-1 concentrations is the inhibition of dipeptidyl peptidase-4 (DPP-4), the enzyme primarily responsible for the degradation of both GIP and GLP-1 (1, 16–18). A near-complete inhibition of DPP-4 causes GIP and GLP-1 concentrations to rise by 2- to 3-fold (16, 19) and is associated with reductions in fasting and postprandial glucose concentrations, stimulation of insulin secretion, and suppression of glucagon (16).

Because incretin hormones usually have low, basal concentrations in the fasting state and rapidly increase after nutrient ingestion (4, 6), DPP-4 inhibition supposedly has primarily postprandial effects, with some additional glucose-lowering effect in the fasting state, and is therefore thought to act as an “incretin enhancer” (20). Therefore, one might expect that the insulin secretory responses after oral glucose would be augmented more than after iv glucose, *i.e.* without the nutrient-stimulated release of incretin hormones, and it could be speculated that this may lead to an at least partial restoration of the reduced incretin effect (9). Therefore, we wanted to quantify the incretin effect by comparing insulin secretory responses to oral as well as isoglycemic iv glucose infusions in patients with type 2 diabetes with and without the administration of the DPP-4 inhibitor, vildagliptin, which has received approval as an antidiabetic drug, including in Europe and Japan. Preliminary results have been communicated in abstract form (21).

## Subjects and Methods

### Study protocol

The study protocol was approved by the ethics committee of the Board of Physicians of the State Niedersachsen (Ärztchamber Niedersachsen), Hannover, before the study (registration no., Bo/12/2006; date of approval, September 20, 2006). Written informed consent was obtained from all participants.

### Subjects

Twenty-two patients with type 2 diabetes participated in the present study. The characteristics of the 21 completers are pre-

**TABLE 1.** Patient characteristics of type 2 diabetic patients participating in the study of incretin effects after vildagliptin treatment

| Parameter                           | Mean $\pm$ SD  | Range     |
|-------------------------------------|----------------|-----------|
| Gender (males/females)              | 18/3           | n.a.      |
| Age (yr)                            | 59 $\pm$ 9     | 35–69     |
| BMI (kg/m <sup>2</sup> )            | 28.6 $\pm$ 2.6 | 23.0–32.5 |
| Diabetes duration (yr)              | 6 $\pm$ 3      | 0.5–11    |
| HbA <sub>1c</sub> (%)               | 7.3 $\pm$ 0.5  | 6.6–8.5   |
| Fasting glucose (mmol/liter)        | 9.3 $\pm$ 1.1  | 6.4–10.9  |
| Serum creatinine ( $\mu$ mol/liter) | 81 $\pm$ 13    | 66–111    |
| Urea (mmol/liter)                   | 5.8 $\pm$ 1.3  | 3.4–8.8   |
| Uric acid ( $\mu$ mol/liter)        | 345 $\pm$ 82   | 252–529   |
| Triglycerides (mmol/liter)          | 2.2 $\pm$ 1.1  | 0.7–4.8   |
| LDL-cholesterol (mmol/liter)        | 3.3 $\pm$ 1.0  | 2.1–5.1   |
| HDL-cholesterol (mmol/liter)        | 1.3 $\pm$ 0.5  | 0.7–2.6   |

n.a., Not applicable; HbA<sub>1c</sub>, glycosylated hemoglobin; LDL, low-density lipoprotein; HDL, high-density lipoprotein.

sented in Table 1. They were all treated with metformin monotherapy before entering the study. Key inclusion criteria were: 1) patients who had received metformin for at least 3 months and had been on a stable dose of at least 1500 mg daily for a minimum of 4 wk before visit 1; 2) agreement to maintain the same dose of metformin throughout the study; 3) age in the range of 30–78 yr inclusive; 4) body mass index in the range of 22–35 kg/m<sup>2</sup> inclusive at visit 1; 5) glycosylated hemoglobin of 6.5–9.0% inclusive at visit 1; and 6) fasting plasma glucose less than 200 mg/dl (11.1 mmol/liter) at visit 1. Patients were excluded if there was a diagnosis or a history of type 1 diabetes, diabetes that is the result of pancreatic injury, or secondary forms of diabetes or acute metabolic diabetic complications such as ketoacidosis or hyperosmolar state (coma) within the past 6 months. (Key inclusion and exclusion criteria are presented in more detail in Supplemental Data, published on The Endocrine Society’s Journals Online web site at <http://jcem.endojournals.org>).

At a screening visit, blood was drawn in the fasting state for measurements of standard hematological and clinical chemistry parameters. Spot urine was sampled for the determination of albumin, protein, and creatinine by standard methods. Body height and weight were measured to calculate the body mass index (Table 1).

### Study design

Patients were enrolled into a double-blinded, two-way crossover study (order randomized) quantifying the incretin effect both under treatment with vildagliptin (100 mg once daily by mouth) or matching placebo tablets. Under both conditions, (both in addition to their previous metformin medication), treatment was started on d 1. On d 12, an oral glucose load (75 g) was administered, and on d 13, an isoglycemic infusion of glucose was administered to copy glucose excursions after oral glucose. In both experiments, blood samples were drawn over 240 min. Between the treatment periods, there was a washout period of 4 wk.

### Experimental procedures

The tests were performed in the morning after an overnight fast with subjects in a supine position throughout the experiments and the upper body lifted by approximately 30 degrees. One or two forearm veins were punctured with a Teflon cannula

(Moskito 123, 18 gauge; Vygon, Aachen, Germany) and kept patent using 0.9% NaCl. Both ear lobes were made hyperemic using Finalgon (nonivamid, 4 mg/g; nicoboxil, 25 mg/g; Boehringer Ingelheim, Ingelheim am Rhein, Germany).

On d 12, an oral glucose challenge (75 g of glucose and glucose oligomers; Accu-Chek Dextro O.G.-T., Roche Diagnostics, Mannheim, Germany) was given at 0 min. On d 13, 20% glucose was administered iv to copy the glycemic excursions after oral glucose (isoglycemic iv glucose infusion). This infusion was guided by determining capillary glucose concentrations every 5 min in blood taken from a hyperemic ear lobe. Glucose infusion rates were changed appropriately, and the infusion rates and time points, when it was changed, were recorded to be able to calculate the total amount of glucose administered as well as infusion rates averaged over 15-min periods.

After drawing basal blood specimens at –20 and –5 min, blood was taken at 15, 30, 45, 60, 75, 90, 105, 120, 180, and 240 min.

### Blood specimens

Blood was drawn into chilled tubes containing EDTA and the DPP-4 inhibitor diprotin A at a final concentration of 0.1 mmol/liter for analysis of GLP-1 (intact and total), GIP (intact), insulin, and C-peptide. For analysis of glucagon, blood was drawn into chilled tubes containing EDTA and aprotinin (Trasylol, 20,000 KIU/ml, 180  $\mu$ l per 9 ml blood; Bayer AG, Leverkusen, Germany) and kept on ice. A capillary sample taken from hyperemic ear lobes (approximately 100  $\mu$ l) was stored in NaF (Microvette CB 300; Sarstedt, Nümbrecht, Germany) for the immediate measurement of glucose. After centrifugation at 4 C, plasma for hormone analyses was divided into aliquots of 0.5 or 1 ml and stored frozen at –30 C.

### Laboratory determinations

Glucose was measured using a glucose oxidase method with a Glucose Analyser 2 (Beckman Instruments, Munich, Germany).

Insulin and C-peptide were determined by specific immunoassays as previously described (22).

Plasma samples were assayed for total GLP-1 immunoreactivity, as previously described (4), using a RIA (antiserum no. 89390) that is specific for the C-terminal of the GLP-1 molecule and reacts equally with intact GLP-1 and the primary (N-terminally truncated) metabolite. Intact GLP-1 was measured using an enzyme-linked immunosorbent assay, as previously described (23). The assay is a two-site sandwich assay involving two monoclonal antibodies: GLP-1F5 as the catching antibody (C-terminally directed), and Mab26.1 as detecting antibody (N-terminally directed) (17). For both assays, the detection limit was below 1 pmol/liter, and the intraassay coefficient of variation was below 5% at 20 pmol/liter.

Intact, biologically active GIP was measured as described (24) using an antiserum reacting with the N-terminal portion of GIP. The experimental detection limit was below 2 pmol/liter. Intra- and interassay coefficients of variation are below 6% and below 12%, respectively.

Pancreatic glucagon was measured using porcine antibody 4305 in ethanol-extracted plasma, as previously described (25). The detection limit was below 1 pmol/liter. Intraassay coefficients of variation were 6%, and interassay coefficients of variation were 16%.

All samples from the same individual were measured in the same assay run.

### Calculations

Integration (area under the curve) was carried out using the trapezoidal rule. Integrated incremental responses describe changes above baseline.

Insulin secretion rates were calculated from C-peptide concentrations using software ISEC version 3.4a, kindly supplied by Dr. Roman Hovorka (London, UK) (26). Population-derived coefficients of transition between compartments were used as described (27, 28).

The incretin effect was calculated based on the integrated incremental responses (trapezoidal rule) of plasma insulin, C-peptide, or insulin secretion rates after oral and isoglycemic iv glucose administration. The difference was related to the respective response after oral glucose, which was taken as 100%. Therefore, incretin effects were expressed as the percentage contribution to the total  $\beta$ -cell secretory response after oral glucose as previously described (8, 9).

### Statistical analysis

Results are reported as mean  $\pm$  SEM. All statistical calculations were carried out using repeated-measures ANOVA with Statistica version 5.0 (Statsoft Europe, Hamburg, Germany). Experiments (vildagliptin *vs.* placebo; oral *vs.* isoglycemic iv glucose) were used as fixed variables and subjects as random variable (to obtain an intraindividual comparison). This analysis provides *P* values for differences between groups/experiments (A), differences over time (B), and for the interaction of group/experiment with time (AB). If a significant interaction of treatment and time was documented ( $P < 0.05$ ), values at single time points were compared by one-way ANOVA for repeated measurements and Duncan's *post hoc* test. A two-sided *P* value  $< 0.05$  was taken to indicate significant differences.

### Results

Vildagliptin led to a slightly reduced fasting glucose (vildagliptin,  $8.8 \pm 0.5$  mmol/liter, compared with placebo,  $9.2 \pm 0.3$  mmol/liter;  $P = 0.19$ ). After oral glucose administration, the integrated incremental glucose concentration relative to placebo was reduced with vildagliptin from  $1352 \pm 78$  to  $1138 \pm 103$  mmol  $\cdot$  liter $^{-1} \cdot$  min by 15.8% ( $P = 0.053$ ) (further results for fasting values, for fasting secretion responses relative to glucose concentration, and for the difference between oral and iv stimulation are shown in Supplemental Table 1A). As proof of the clinical effectiveness of vildagliptin treatment, the ratios of integrated incremental responses of insulin, C-peptide, and insulin secretion rates over glycemic excursions were significantly enhanced by 91.9, 82.9, and 85.1% ( $P = 0.003$ , 0.002, and 0.0006) (Supplemental Table 1B).

It was possible to closely match the glucose excursion after oral and iv glucose administration (Fig. 1, C and D); some negligible differences were noted. Nevertheless, the conditions of isoglycemia necessary to accurately quantify the incretin effect were met. Both with placebo and with vildagliptin treatment, oral glucose elicited a higher insulin secretory response (whether based on insulin, C-peptide, or the calculation of insulin secretion rates; Fig. 1),

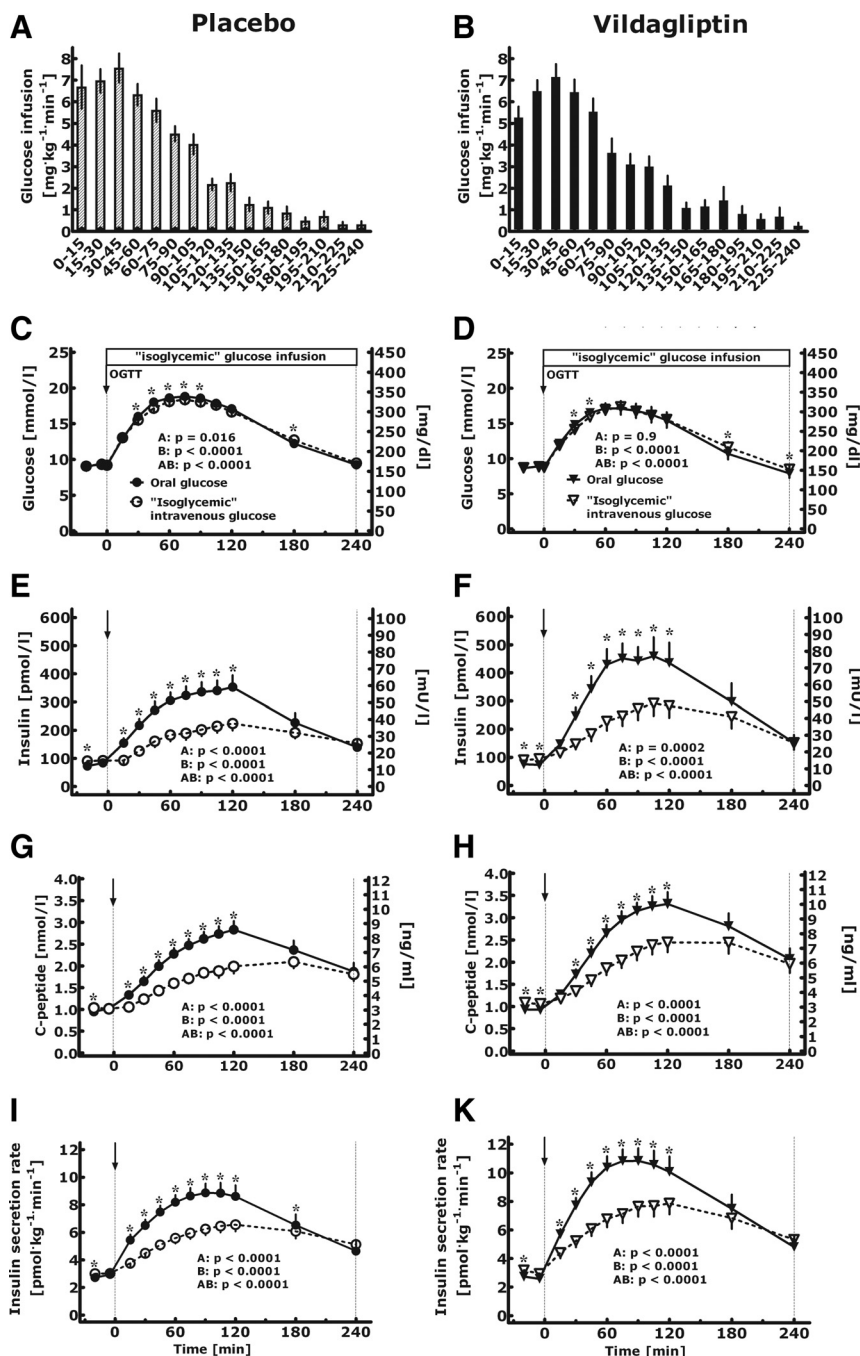

**FIG. 1.** Glucose infusion rates (A and B); concentrations of plasma glucose (C and D), insulin (E and F), and C-peptide (G and H); and insulin secretion rates (I and K) with placebo (A, C, E, G, I) and vildagliptin (B, D, F, H, K) after stimulation with oral glucose, 75 g (filled symbols) and isoglycemic iv glucose (open symbols), respectively, in patients with type 2 diabetes. Data are expressed as mean  $\pm$  SEM. *P* values (A, B, and AB) are the result of repeated measures ANOVA and denote differences by experiment (A), differences over time (B), and differences due to the interaction of experiment and time (AB). \*, Significant differences ( $P < 0.05$ ) at individual time points (ANOVA). Arrows indicate the time of administration of oral glucose.

demonstrating a residual incretin effect in our type 2 diabetic patients. Quantitatively speaking, these results are compatible with previous publications describing a somewhat reduced incretin effect in patients with diabetes (9, 29).

Vildagliptin treatment significantly enhanced insulin secretion both under the condition of oral glucose stimu-

lation and with the iv glucose stimulus (Table 2). This was the case despite the finding that, as expected, both intact GIP and GLP-1 concentrations were raised considerably more after oral glucose stimulation than during iv glucose infusions (Figs. 2 and 3 and Table 3). However, in experiments after vildagliptin and placebo treatment, a slight but significant increase in intact GLP-1 levels above baseline concentrations was noted after iv glucose administration (placebo,  $P = 0.0002$ ; vildagliptin,  $P < 0.0001$ ; Fig. 2). If the incretin effect was calculated as the contribution of gut factors to the insulin secretory responses after oral glucose, vildagliptin treatment did not change the numerical value, no matter whether this calculation was based on insulin, C-peptide, or insulin secretion rates. In line with the concept of gastrointestinally mediated glucose disposal (30), the total amount of glucose infused with and without vildagliptin treatment was similar ( $65.9 \pm 2.1$  vs.  $63.6 \pm 5.3$  g per experiment;  $P = 0.64$ ), indicating no significant change in the incretin effect (Table 2).

Glucagon concentrations were suppressed with both oral and iv glucose, and in a similar manner under vildagliptin and placebo treatment (Fig. 3). Intravenous glucose led to an earlier suppression of glucagon than did oral glucose, as previously observed in healthy subjects and type 2 diabetic patients (30, 31).

As is obvious from a nonsignificant difference between total GLP-1 response to oral glucose with vildagliptin and placebo (Table 3), we found no evidence of feedback inhibition of L-cell secretion in response to the administration of the DPP-4 inhibitor vildagliptin after 12–13 d of treatment.

## Discussion

Inhibitors of the DPP-4 are thought to augment the activity of endogenously released GLP-1 (and GIP and, perhaps, other gut hormones that also are substrate to this peptidase) (32). The release of GLP-1 from L cells follows a typical temporal pattern, with fasting (basal) concentra-



**TABLE 2.** Integrated incremental responses of insulin, C-peptide, and insulin secretion rates (calculated by deconvolution) after oral glucose stimulation and during the isoglycemic iv infusion of glucose in type 2 diabetic patients treated with vildagliptin or placebo, and the amount of glucose administered per experiment

| Parameter                                                                   | Oral glucose    | Isoglycemic iv glucose | Difference (oral – iv) | Significance (P value) oral vs. iv glucose | Incretin effect (%) |
|-----------------------------------------------------------------------------|-----------------|------------------------|------------------------|--------------------------------------------|---------------------|
| $\int$ Insulin ( $\text{mU} \cdot \text{liter}^{-1} \cdot \text{min}$ )     |                 |                        |                        |                                            |                     |
| Placebo                                                                     | 7064 $\pm$ 891  | 3497 $\pm$ 467         | 3568 $\pm$ 504         | <0.0001                                    | 49.5 $\pm$ 3.4      |
| Vildagliptin                                                                | 9934 $\pm$ 1540 | 5156 $\pm$ 989         | 4778 $\pm$ 1255        | 0.001                                      | 44.2 $\pm$ 6.8      |
| P value                                                                     | 0.009           | 0.044                  | 0.30                   |                                            | 0.48                |
| $\int$ C-peptide ( $\text{nmol} \cdot \text{liter}^{-1} \cdot \text{min}$ ) |                 |                        |                        |                                            |                     |
| Placebo                                                                     | 304 $\pm$ 29    | 179 $\pm$ 18           | 125 $\pm$ 16           | <0.0001                                    | 40.1 $\pm$ 3.7      |
| Vildagliptin                                                                | 397 $\pm$ 38    | 239 $\pm$ 32           | 158 $\pm$ 30           | <0.0001                                    | 38.5 $\pm$ 5.2      |
| P value                                                                     | 0.0004          | 0.028                  | 0.27                   |                                            | 0.82                |
| $\int$ Insulin secretion rate (pmol/kg)                                     |                 |                        |                        |                                            |                     |
| Placebo                                                                     | 1008 $\pm$ 123  | 626 $\pm$ 69           | 382 $\pm$ 70           | <0.0001                                    | 34.6 $\pm$ 4.0      |
| Vildagliptin                                                                | 1338 $\pm$ 146  | 829 $\pm$ 109          | 508 $\pm$ 98           | <0.0001                                    | 35.7 $\pm$ 4.9      |
| P value                                                                     | 0.0006          | 0.013                  | 0.20                   |                                            | 0.80                |
| Glucose administration (g/experiment)                                       |                 |                        |                        |                                            |                     |
| Placebo                                                                     | 75 $\pm$ 0      | 65.9 $\pm$ 2.1         | 9.1 $\pm$ 2.1          | 0.0003                                     | 12.2 $\pm$ 2.7      |
| Vildagliptin                                                                | 75 $\pm$ 0      | 63.6 $\pm$ 5.3         | 11.4 $\pm$ 5.3         | 0.043                                      | 15.2 $\pm$ 7.1      |
| P value                                                                     | 1.0             | 0.64                   | 0.64                   |                                            | 0.64                |

Differences between experiments with oral and isoglycemic iv glucose and the percentage contribution of the incretin effect to insulin secretory responses after oral glucose are shown.  $\int$ , Integrated incremental responses (over baseline), mean  $\pm$  SEM (n = 21).

tions being low and nutrient stimulation leading to substantial increases in plasma concentrations for a period of several hours (4–6). Therefore, it was reasonable to assume that DPP-4 inhibitors will lead to a greater augmen-

tation of insulin secretion when given in association with oral nutrients, which increase both glucose concentrations and the release of gut hormones including GIP and GLP-1, than with iv glucose infusions, which raise glycemic levels to

the same degree (isoglycemia) but do not substantially elicit a secretory response from either K cells (GIP) or L cells (GLP-1) (Figs. 2 and 3 and Table 3).

Surprisingly, insulin secretion was augmented by vildagliptin treatment not only after oral glucose stimulation, but also during isoglycemic iv glucose infusions (Fig. 1 and Table 2), although the patterns of GIP and GLP-1 release were as expected (4–6), *i.e.* much more accentuated after oral glucose than during iv glucose administration (Fig. 2). However, in the present study, there was also a minor rise in the concentrations of intact GLP-1 accompanying iv glucose administration, especially after vildagliptin treatment. This may have contributed to the augmented insulin secretory responses after DPP-4 inhibitor treatment.

It could be argued that the reduction in glycemic excursions after oral glucose administration after vildagliptin treatment may have caused a subse-

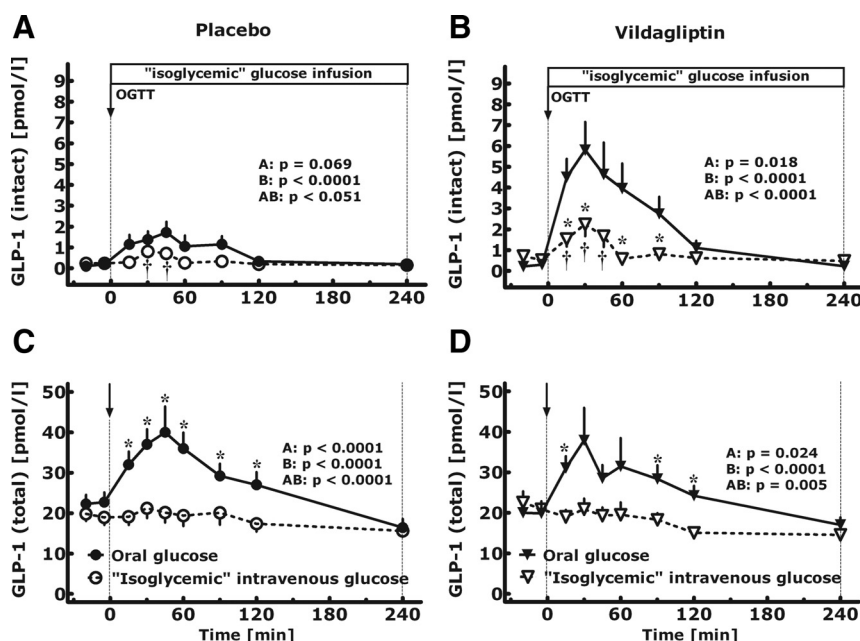

**FIG. 2.** Concentrations of GLP-1 (intact) and GLP-1 (total) with placebo (A and C) and vildagliptin (B and D) after stimulation with oral glucose, 75 g (filled symbols), and isoglycemic iv glucose (open symbols), respectively, in patients with type 2 diabetes. Data are expressed as mean  $\pm$  SEM. P values are the result of repeated measures ANOVA and denote differences by experiment (A), differences over time (B), and differences due to the interaction of experiment and time (AB). †, Significant difference ( $P < 0.05$ ) vs. baseline value of intact GLP-1. \*, Significant differences ( $P < 0.05$ ) at individual time points (ANOVA). Arrows indicate the time of administration of oral glucose.

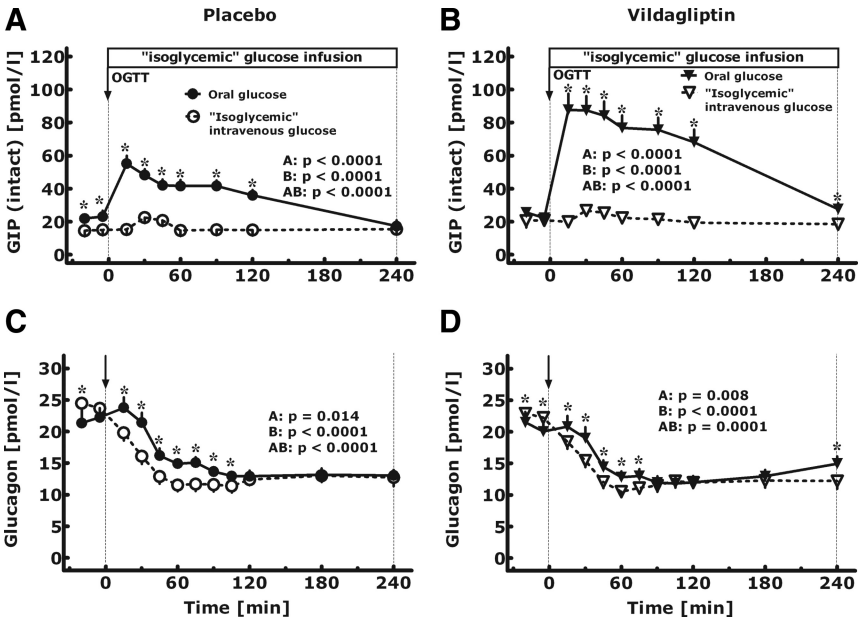

**FIG. 3.** Plasma concentrations of GIP (intact) and glucagon with placebo (A and C) and vildagliptin (B and D) after stimulation with oral glucose, 75 g (filled symbols), and isoglycemic iv glucose (open symbols), respectively, in patients with type 2 diabetes. Data are expressed as mean  $\pm$  SEM. P values are the result of repeated measures ANOVA and denote differences by experiment (A), differences over time (B), and differences due to the interaction of experiment and time (AB). \*, Significant differences ( $P < 0.05$ ) at individual time points (ANOVA). Arrows indicate the time of administration of oral glucose.

quent reduction in insulin secretion due to a lower glycemic stimulus. This should, however, affect the insulin secretory responses during isoglycemic iv glucose infusions in the same manner because glucose infusions would aim at lower glucose concentrations in this case. Most likely, insulin secretion in response to oral and iv glucose would be affected to a similar degree, leaving the main parameter studied, the incretin effect, relatively uninfluenced.

Based on the methodology to measure the incretin effect, any reduction in glycemic levels after oral glucose will lead to a lower glucose level during isoglycemic iv glucose adminis-

tration as well. So we assume that the net effect for the calculated incretin effect (percentage contribution of gut stimulation) should be negligible. Because patients with diabetes have a smaller incretin effect than metabolically healthy subjects (normal glucose tolerance), any reduction in glycemic levels might be assumed to be associated with an improved incretin effect. However, in cross-sectional studies, this is only the case below a fasting glucose of approximately 126 mg/dl (33). This again suggests that a minor reduction in hyperglycemia should not *per se* have affected the incretin effect as measured in this study.

It is interesting that a recent study (34) shows that exendin (9–39) reduced insulin responses to iv glucose, suggesting that this might be evidence for an effect of endogenous GLP-1 (at low, basal levels) to promote glucose-induced insulin secretion regardless of the mode of glucose administration (34). One might argue that with vildagliptin there was at least a minor increase in intact, biologically active GLP-1 (Fig. 2B) and GIP (Fig. 3B) that also followed iv glucose administration. However, this was not a statistically significant finding, and it is worth studying with a more adequate sample size. Even small increments may indicate much larger changes occurring in the portal vein (35).

Our findings do not support the presence of feedback inhibition of L cells in response to the administration of a DPP-4 inhibitor like vildagliptin, as previously described

**TABLE 3.** Integrated incremental responses ( $\int$ ) after oral glucose stimulation and during the iv infusion of glucose of total (nonspecific assay) GLP-1, intact, biologically active GLP-1, and intact, biologically active GIP (for time courses, see Fig. 2) induced by DPP-4 inhibitor administration

| Parameter                                                            | Oral glucose    | Isoglycemic iv glucose | Significance (P value) oral vs. iv glucose |
|----------------------------------------------------------------------|-----------------|------------------------|--------------------------------------------|
| $\int$ GLP-1 (total) (pmol $\cdot$ liter <sup>-1</sup> $\cdot$ min)  |                 |                        |                                            |
| Placebo                                                              | 1750 $\pm$ 329  | 438 $\pm$ 131          | 0.0012                                     |
| Vildagliptin                                                         | 1819 $\pm$ 542  | 163 $\pm$ 110          | 0.0090                                     |
| P value                                                              | 0.92            | 0.13                   |                                            |
| $\int$ GLP-1 (intact) (pmol $\cdot$ liter <sup>-1</sup> $\cdot$ min) |                 |                        |                                            |
| Placebo                                                              | 133 $\pm$ 40    | 32 $\pm$ 13            | 0.0243                                     |
| Vildagliptin                                                         | 420 $\pm$ 99    | 83 $\pm$ 17            | 0.0044                                     |
| P value                                                              | 0.0048          | 0.02                   |                                            |
| $\int$ GIP (intact) (pmol $\cdot$ liter <sup>-1</sup> $\cdot$ min)   |                 |                        |                                            |
| Placebo                                                              | 3370 $\pm$ 475  | 986 $\pm$ 202          | <0.0001                                    |
| Vildagliptin                                                         | 9220 $\pm$ 1197 | 1197 $\pm$ 241         | <0.0001                                    |
| P value                                                              | <0.0001         | 0.58                   |                                            |

Data are expressed as mean  $\pm$  SEM.

(22). The integrated incremental response of total GLP-1 (including DPP-4 breakdown metabolites) with vildagliptin administration (Fig. 2 and Table 3) was not significantly reduced after 12–13 d of treatment. This is in contrast to previous observations describing a significantly suppressed secretion of GLP-1 (postprandial response of total GLP-1 after oral glucose or a meal) after a single dose of vildagliptin (22) or sitagliptin (19). This may be more prominent after mixed meals, whereas in the present study oral glucose was used as the nutrient stimulus. Our present results may indicate that feedback inhibition of GLP-1 secretion by DPP-4 inhibitor is a transient phenomenon triggering compensatory mechanisms that reestablish normal GLP-1 release within periods shorter than 2 wk. It may be worth studying the time course of feedback inhibition in more detail because it could parallel the establishment of the full glucose-lowering activity of DPP-4 inhibitor treatment. A study comparing 1 and 12 wk of treatment with sitagliptin has recently been published (36). The longer term absence of such a feedback inhibition may contribute to the efficacy of DPP-4 inhibition in terms of antihyperglycemic activity.

It was expected that vildagliptin treatment, by inhibiting DPP-4 and leading to higher intact GLP-1 (and GIP) concentrations (Figs. 2 and 3), would augment insulin secretion in response to hyperglycemia. Most likely, GLP-1 interacted with the endocrine pancreas to help release insulin as part of its preserved incretin activity in patients with type 2 diabetes (1, 37). It is an open question whether GIP has made a significant contribution to this process because GIP is hardly insulinotropic in hyperglycemic patients with type 2 diabetes (10, 38). The ability of GIP to augment insulin secretion could only partly be rescued by intensive diabetes treatment aiming at near-normal glucose control in such patients (39, 40).

It may be argued that vildagliptin had only a weak antidiabetic effect in terms of lowering fasting glucose and postload glycemic excursions. However, vildagliptin, under the conditions of this study, clearly augmented insulin secretory responses relative to glycemic excursions. Thus, the present protocol was suitable for studying the role of incretins for insulin secretion after oral and iv glucose administration.

What might be the factors that—under the influence of DPP-4 inhibition—augment glucose-induced insulin secretion also during iv glucose infusions, when studied under treatment with vildagliptin? In the light of apparent biological activity of basal levels of incretin hormones, it is of interest that infusion of a GLP-1 receptor antagonist, exendin (9–39), raised glucagon concentrations in healthy subjects, indicating a tonic inhibition of glucagon secretion even by low, basal GLP-1 concentrations (41). A small overnight rise in intact, biologically active

GLP-1 with DPP-4 inhibition (vildagliptin treatment; Fig. 2B) may have elicited an increased influence on both glucagon (suppression) and insulin secretion (augmentation), even with iv glucose not stimulating GLP-1 secretion from L cells. One might, in addition, speculate that there are additional peptides with biological activity, substrates to DPP-4 as well as GLP-1 and GIP, that are insulinotropic, but are present also or even predominantly in the fasting state (unlike typical incretins). Candidates might be neuropeptides like pituitary adenylate cyclase-activating polypeptide (42) that act locally rather than being transported to the target cells via the blood stream.

Glucagon was suppressed more readily with iv glucose than with oral glucose (Fig. 3). This is in line with recent observations (30, 31) and may indicate that GIP (released by oral glucose) may stimulate glucagon secretion (43).

It may be noted that in our cohort of type 2 diabetic patients, there was a significant incretin effect, which is in contrast to the previously described original cohort (9), who did not display a significant incretin effect at all. The sample size ( $n = 21$ ) in the present study was greater than in the published study ( $n = 14$ ), and the laboratory methods for determining insulin secretory products most likely have improved, which makes the detection of differences easier. As a result, our conclusion would be that the incretin effect in patients with type 2 diabetes is reduced (if compared with healthy subjects) but is preserved to some extent in the majority of subjects, in line with other recent studies (29). This may in part be the consequence of reduced glucotoxicity (44), which should affect insulin secretory responses to oral and iv glucose to a similar degree. It could, however, also be that metformin treatment in our subjects may have further stimulated L-cell secretion (45), potentially leading to an improvement in the incretin effect in comparison to less well-controlled, non-metformin-treated patients.

The fact that the numerical incretin effect was not changed by vildagliptin treatment is based on one commonly used approach to calculating/estimating the influence of incretins on post-nutrient-intake insulin secretory responses. With both the insulin secretory responses after oral and iv glucose administration being augmented, the difference between the two, in absolute terms, was increased (although not significantly; Supplemental Table 1A).

An interesting observation is the fact that the amount of glucose that has to be administered to obtain isoglycemia is a good surrogate measure of the incretin effect. The more glucose that needs to be infused to match glycemia to that after 75 g of oral glucose, the more the incretin effect is reduced if the difference in glucose administration between oral and iv route is expressed as the percentage of the 75-g oral glucose load. This significantly correlates

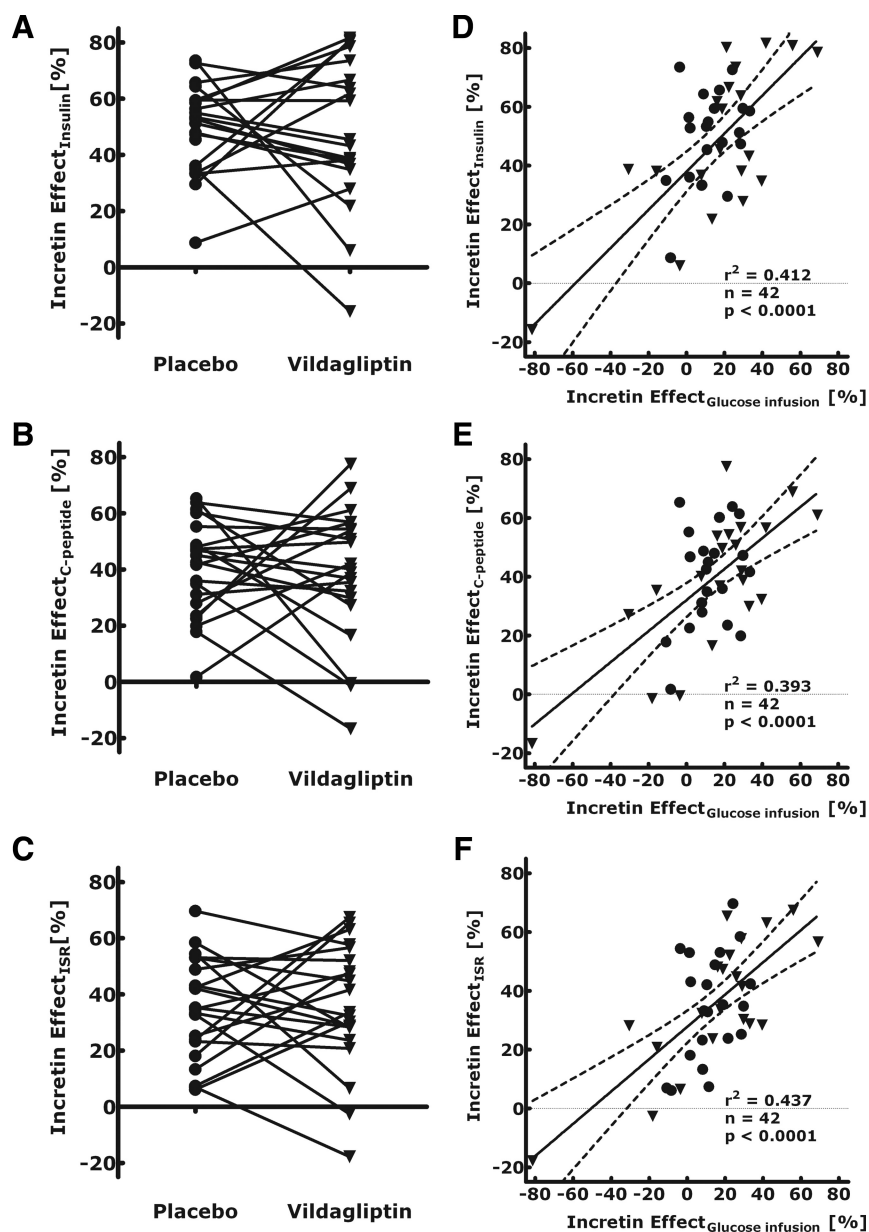

**FIG. 4.** Left, Scatter diagrams depicting individual incretin effects after treatment with placebo or vildagliptin, based on insulin (A), C-peptide (B), or insulin secretion rates (ISR) (C). Right, Regression analysis correlating incretin effects based on the amount of glucose administered during experiments with oral and isoglycemic iv glucose and incretin effects based on integrated incremental responses of insulin (D), C-peptide (E), and insulin secretion rates (F) are shown. For details, see *Subjects and Methods*.

with the incretin effect determined from insulin, C-peptide, and insulin secretion rates ( $r^2 = 0.393$ – $0.437$ ;  $P < 0.0001$  for all comparisons) (Fig. 4), indicating that with or without insulinotropic activity contributed by incretin hormones, the amount of insulin secreted per gram of glucose administered is more or less the same, as long as the glucose concentrations are comparable (isoglycemia). This is a remarkable aspect of the integrated regulation of glucose metabolism that has recently been emphasized by Knop *et al.* (30) in type 2 diabetic patients and by Hare *et al.* (46) even for type 1 diabetic patients.

In conclusion, vildagliptin augments insulin secretory responses both in response to the administration of oral glucose (accompanied by the release of incretin hormones) and during the iv infusion of glucose (*i.e.* without a major incretin response). Thus, against expectations, the incretin effect is not enhanced by DPP-4 inhibitor treatment, mainly due to a surprising augmentation of insulin secretory responses even with iv glucose infusions. The nature of this phenomenon needs to be further elucidated in mechanistic studies characterizing the mode of action of DPP-4 inhibitors, for example using GLP-1 receptor antagonists to more precisely define the role of GLP-1 as opposed to additional factors as mediators of DPP-4 inhibition.

## Acknowledgments

The excellent technical assistance of Brigitte Nawrodt, Ute Buss, and Sabine Schminkel (Diabeteszentrum Bad Lauterberg) is acknowledged. We also thank Sabine Ciossek for secretarial assistance and Larissa Becker (Diabeteszentrum Bad Lauterberg) for excellent help with performing oral and isoglycemic iv glucose administration experiments. We thank Sofie Pilgaard and Lene Albæk (Panum Institute, University of Copenhagen) for expert technical assistance. We gratefully acknowledge the logistical support provided by Michelle Valentin.

Address all correspondence and requests for reprints to: Prof. Dr. med. Michael Nauck, Diabeteszentrum Bad Lauterberg, Kirchberg 21, D-37431 Bad Lauterberg im Harz, Germany. E-mail: M.Nauck@diabeteszentrum.de.

This study was supported by a grant

from Novartis Pharma AG and by the Danish Research Council.

**Disclosure Summary:** I.V. has received lecture honoraria from Novo Nordisk, Eli Lilly & Co., and Berlin Chemie/Menarini. M.A.N. has received grants to support clinical studies and speaking honoraria from Novartis Pharma and has received grants, speaking, and consulting honoraria compensation for participating in advisory boards from other companies producing DPP-4 inhibitors and GLP-1 receptor agonists (who might be viewed as competitors). L.D.K. has nothing to disclose. C.F.D. has received consultancy/lecture fees from BMS, Eli Lilly & Co., Merck, Novartis, and Novo Nordisk; the author's spouse is employed by Merck. J.J.H. has nothing to disclose. A.S. is an em-



ployee and stockholder of Novartis Pharma AG, Basel, Switzerland. J.E.F. is an employee of Novartis Pharma Corporation and stockholder of Novartis Pharmaceuticals.

## References

- Drucker DJ, Nauck MA 2006 The incretin system: glucagon-like peptide-1 receptor agonists and dipeptidyl peptidase-4 inhibitors in type 2 diabetes. *Lancet* 368:1696–1705
- Nauck MA, Bartels E, Orskov C, Ebert R, Creutzfeldt W 1993 Additive insulinotropic effects of exogenous synthetic human gastric inhibitory polypeptide and glucagon-like peptide-1-(7-36) amide infused at near-physiological insulinotropic hormone and glucose concentrations. *J Clin Endocrinol Metab* 76:912–917
- Nauck MA, Heimesaat MM, Behle K, Holst JJ, Nauck MS, Ritzel R, Hufner M, Schmiegel WH 2002 Effects of glucagon-like peptide 1 on counterregulatory hormone responses, cognitive functions, and insulin secretion during hyperinsulinemic, stepped hypoglycemic clamp experiments in healthy volunteers. *J Clin Endocrinol Metab* 87:1239–1246
- Orskov C, Rabenhøj L, Wettergren A, Kofod H, Holst JJ 1994 Tissue and plasma concentrations of amidated and glycine-extended glucagon-like peptide 1 in humans. *Diabetes* 43:535–539
- Orskov C, Wettergren A, Holst JJ 1996 Secretion of the incretin hormones glucagon-like peptide-1 and gastric inhibitory polypeptide correlates with insulin secretion in normal man throughout the day. *Scand J Gastroenterol* 31:665–670
- Nauck MA, El-Ouaghli A, Gabrys B, Hücking K, Holst JJ, Deacon CF, Gallwitz B, Schmidt WE, Meier JJ 2004 Secretion of incretin hormones (GIP and GLP-1) and incretin effect after oral glucose in first-degree relatives of patients with type 2 diabetes. *Regul Pept* 122:209–217
- Tillil H, Shapiro ET, Miller MA, Karrison T, Frank BH, Galloway JA, Rubenstein AH, Polonsky KS 1988 Dose-dependent effects of oral and intravenous glucose on insulin secretion and clearance in normal humans. *Am J Physiol* 254:E349–E357
- Nauck MA, Homberger E, Siegel EG, Allen RC, Eaton RP, Ebert R, Creutzfeldt W 1986 Incretin effects of increasing glucose loads in man calculated from venous insulin and C-peptide responses. *J Clin Endocrinol Metab* 63:492–498
- Nauck M, Stöckmann F, Ebert R, Creutzfeldt W 1986 Reduced incretin effect in type 2 (non-insulin-dependent) diabetes. *Diabetologia* 29:46–52
- Nauck MA, Heimesaat MM, Orskov C, Holst JJ, Ebert R, Creutzfeldt W 1993 Preserved incretin activity of glucagon-like peptide 1 [7–36 amide] but not of synthetic human gastric inhibitory polypeptide in patients with type-2 diabetes mellitus. *J Clin Invest* 91:301–307
- Nauck MA, Baller B, Meier JJ 2004 Gastric inhibitory polypeptide and glucagon-like peptide-1 in the pathogenesis of type 2 diabetes. *Diabetes* 53(Suppl 3):S190–S196
- Kjems LL, Holst JJ, Völund A, Madsbad S 2003 The influence of GLP-1 on glucose-stimulated insulin secretion: effects on  $\beta$ -cell sensitivity in type 2 and nondiabetic subjects. *Diabetes* 52:380–386
- Toft-Nielsen MB, Damholt MB, Madsbad S, Hilsted LM, Hughes TE, Michelsen BK, Holst JJ 2001 Determinants of the impaired secretion of glucagon-like peptide-1 in type 2 diabetic patients. *J Clin Endocrinol Metab* 86:3717–3723
- Nauck MA, Kleine N, Orskov C, Holst JJ, Willms B, Creutzfeldt W 1993 Normalization of fasting hyperglycaemia by exogenous glucagon-like peptide 1 (7-36 amide) in type 2 (non-insulin-dependent) diabetic patients. *Diabetologia* 36:741–744
- Nauck MA, Meier JJ 2005 Glucagon-like peptide 1 (GLP-1) and its derivatives in the treatment of diabetes. *Regul Pept* 128:135–148
- Ahrén B, Landin-Olsson M, Jansson PA, Svensson M, Holmes D, Schweizer A 2004 Inhibition of dipeptidyl peptidase-4 reduces glycemia, sustains insulin levels, and reduces glucagon levels in type 2 diabetes. *J Clin Endocrinol Metab* 89:2078–2084
- Ahrén B 2007 DPP-4 inhibitors. *Best Pract Res Clin Endocrinol Metab* 21:517–533
- Holst JJ, Deacon CF 1998 Inhibition of the activity of dipeptidyl-peptidase IV as a treatment for type 2 diabetes. *Diabetes* 47:1663–1670
- Herman GA, Bergman A, Stevens C, Kotey P, Yi B, Zhao P, Dietrich B, Golor G, Schrödter A, Keymeulen B, Lasseter KC, Kipnes MS, Snyder K, Hilliard D, Tanen M, Cilissen C, De Smet M, de Lepeleire I, Van Dyck K, Wang AQ, Zeng W, Davies MJ, Tanaka W, Holst JJ, Deacon CF, Gottesdiener KM, Wagner JA 2006 Effect of single oral doses of sitagliptin, a dipeptidyl peptidase-4 inhibitor, on incretin and plasma glucose levels after an oral glucose tolerance test in patients with type 2 diabetes. *J Clin Endocrinol Metab* 91:4612–4619
- D'Alessio DA, Denney AM, Hermiller LM, Prigeon RL, Martin JM, Tharp WG, Saylan ML, He Y, Dunning BE, Foley JE, Pratley RE 2009 Treatment with the dipeptidyl peptidase-4 inhibitor vildagliptin improves fasting islet-cell function in subjects with type 2 diabetes. *J Clin Endocrinol Metab* 94:81–88
- Foley JE, Becker L, Köthe L, Dejager S, Schweizer A, Nauck MA 2008 Inhibition of DPP-4 with vildagliptin improved insulin secretion in response to oral as well as “isoglycemic” glucose without numerically changing the incretin effect in patients with type 2 diabetes. *Diabetologia* 51(Suppl 1):367
- El-Ouaghli A, Rehling E, Holst JJ, Schweizer A, Foley J, Holmes D, Nauck MA 2007 The dipeptidyl peptidase 4 inhibitor vildagliptin does not accentuate glibenclamide-induced hypoglycemia but reduces glucose-induced glucagon-like peptide 1 and gastric inhibitory polypeptide secretion. *J Clin Endocrinol Metab* 92:4165–4171
- Vilsbøll T, Krarup T, Deacon CF, Madsbad S, Holst JJ 2001 Reduced postprandial concentrations of intact biologically active glucagon-like peptide 1 in type 2 diabetic patients. *Diabetes* 50:609–613
- Deacon CF, Nauck MA, Meier J, Hücking K, Holst JJ 2000 Degradation of endogenous and exogenous gastric inhibitory polypeptide in healthy and in type 2 diabetic subjects as revealed using a new assay for the intact peptide. *J Clin Endocrinol Metab* 85:3575–3581
- Holst JJ 1982 Evidence that peak II GLI or enteroglucagon is identical to the C-terminal sequence (residues 33–69) of glicentin. *Biochem J* 207:381–388
- Hovorka R, Soons PA, Young MA 1996 ISEC: a program to calculate insulin secretion. *Comput Methods Programs Biomed* 50:253–264
- Eaton RP, Allen RC, Schade DS, Erickson KM, Standefer J 1980 Prehepatic insulin production in man: kinetic analysis using peripheral connecting peptide behaviour. *J Clin Endocrinol Metab* 51:520–528
- Polonsky KS, Licinio-Paixao J, Given BD, Pugh W, Rue P, Galloway J, Karrison T, Frank B 1986 Use of biosynthetic human C-peptide in the measurement of insulin secretion rates in normal volunteers and type 1 diabetic patients. *J Clin Invest* 77:98–105
- Knop FK, Vilsbøll T, Højberg PV, Larsen S, Madsbad S, Völund A, Holst JJ, Krarup T 2007 Reduced incretin effect in type 2 diabetes: cause or consequence of the diabetic state? *Diabetes* 56:1951–1959
- Knop FK, Vilsbøll T, Madsbad S, Holst JJ, Krarup T 2007 Inappropriate suppression of glucagon during OGTT but not during isoglycaemic i.v. glucose infusion contributes to the reduced incretin effect in type 2 diabetes mellitus. *Diabetologia* 50:797–805
- Meier JJ, Deacon CF, Schmidt WE, Holst JJ, Nauck MA 2007 Suppression of glucagon secretion is lower after oral glucose administration than during intravenous glucose administration in human subjects. *Diabetologia* 50:806–813
- Deacon CF, Carr RD, Holst JJ 2008 DPP-4 inhibitor therapy: new directions in the treatment of type 2 diabetes. *Front Biosci* 13:1780–1794
- Meier JJ, Nauck MA 2010 Is the diminished incretin effect in type

- 2 diabetes just an epi-phenomenon of impaired  $\beta$ -cell function? Diabetes 59:1117–1125
34. Salehi M, Aulinger B, Prigeon RL, D'Alessio DA 2010 Effect of endogenous GLP-1 on insulin secretion in type 2 diabetes. Diabetes 59:1330–1337
  35. Hjøllund KR, Hughes TE, Deacon CF, Holst JJ 2008 The dipeptidyl peptidase inhibitor vildagliptin increases portal concentrations of active GLP-1 to a greater extent than the peripheral concentrations (abstract). Diabetes 57 (Suppl 1):A411
  36. Aaboe K, Knop FK, Vilsbøll T, Deacon CF, Holst JJ, Madsbad S, Krarup T 2010 Twelve weeks treatment with the DPP-4 inhibitor, sitagliptin, prevents degradation of peptide YY and improves glucose and non-glucose induced insulin secretion in patients with type 2 diabetes mellitus. Diabetes Obes Metab 12:323–333
  37. Gromada J, Bokvist K, Ding WG, Holst JJ, Nielsen JH, Rorsman P 1998 Glucagon-like peptide 1 (7-36) amide stimulates exocytosis in human pancreatic  $\beta$ -cells by both proximal and distal regulatory steps in stimulus-secretion coupling. Diabetes 47:57–65
  38. Vilsbøll T, Krarup T, Madsbad S, Holst JJ 2002 Defective amplification of the late phase insulin response to glucose by GIP in obese type II diabetic patients. Diabetologia 45:1111–1119
  39. Højberg PV, Zander M, Vilsbøll T, Knop FK, Krarup T, Vølund A, Holst JJ, Madsbad S 2008 Near normalisation of blood glucose improves the potentiating effect of GLP-1 on glucose-induced insulin secretion in patients with type 2 diabetes. Diabetologia 51:632–640
  40. Højberg PV, Vilsbøll T, Zander M, Knop FK, Krarup T, Vølund A, Holst JJ, Madsbad S 2008 Four weeks of near-normalization of blood glucose has no effect on postprandial GLP-1 and GIP secretion, but augments pancreatic B-cell responsiveness to a meal in patients with type 2 diabetes. Diabet Med 25:1268–1275
  41. Schirra J, Sturm K, Leicht P, Arnold R, Göke B, Katschinski M 1998 Exendin (9-39) amide is an antagonist of glucagon-like peptide-1 (7-36) amide in humans. J Clin Invest 101:1421–1430
  42. Ahrén B, Hughes TE 2005 Inhibition of dipeptidyl peptidase-4 augments insulin secretion in response to exogenously administered glucagon-like peptide-1, glucose-dependent insulinotropic polypeptide, pituitary adenylate cyclase-activating polypeptide, and gastrin-releasing peptide in mice. Endocrinology 146:2055–2059
  43. Meier JJ, Gallwitz B, Siepmann N, Holst JJ, Deacon CF, Schmidt WE, Nauck MA 2003 Gastric inhibitory polypeptide (GIP) dose-dependently stimulates glucagon secretion in healthy human subjects at euglycaemia. Diabetologia 46:798–801
  44. Yki-Järvinen H 1992 Glucose toxicity. Endocr Rev 13:415–431
  45. Migoya EM, Miller JL, Larson P, Tanen M, Hilliard D, Deacon C, Gutierrez M, Stoch A, Herman G, Stein P, Holst JJ, Wagner JA 2007 Sitagliptin, a selective DPP-4 inhibitor, and metformin have complementary effects to increase active GLP-1 concentrations. Diabetologia 50(Suppl 1):S52
  46. Hare KJ, Vilsbøll T, Holst JJ, Knop FK 2010 Inappropriate glucagon response after oral compared with isoglycemic intravenous glucose administration in patients with type 1 diabetes. Am J Physiol Endocrinol Metab 298:E832–E837

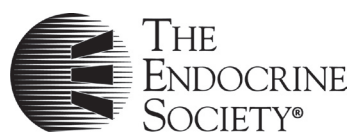

**Join The Endocrine Society** and network with  
endocrine thought leaders from around the world.

[www.endo-society.org/join](http://www.endo-society.org/join)
